# Supplementary material for: Sensitive detection of circulating methylated SEPT9 in hepatocellular carcinoma patients using a novel quantitative PCR assay
Source: Royal Society of Chemistry journal article supplement (doi:10.1039/d4ay02168a), 2025-01-01
Supplement: d4ay02168a1.pdf [file d4ay02168a1.pdf]

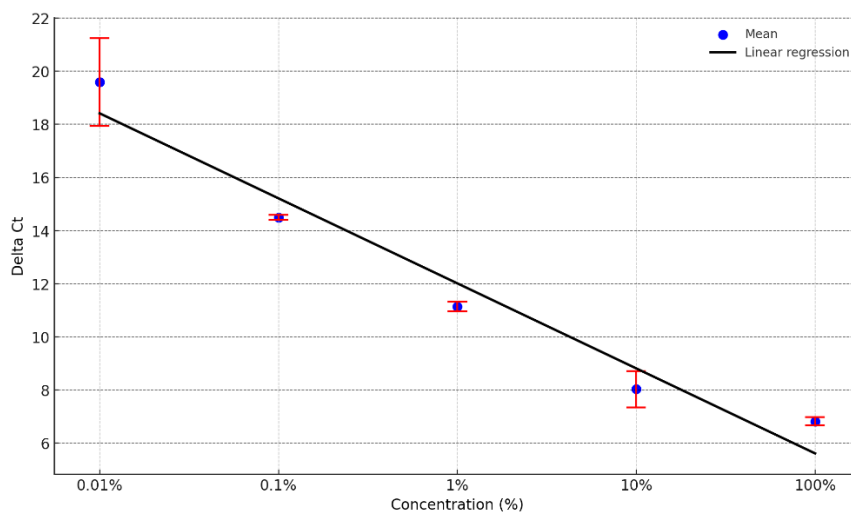

**Figure 1S: Linear relationship between  $\Delta C_t$  values and methylation concentrations in synthetic standard samples.** The  $\Delta C_t$  values were calculated by subtracting the  $C_t$  values of mSEPT9-specific amplification from the consistent  $C_t$  values of total SEPT9. The observed linear trend, with a regression coefficient of  $R^2=0.9415$ , confirms the reliability of  $\Delta C_t$  as a robust metric for relative methylation quantification across a range of methylation concentrations. Error bars represent the standard deviation from duplicate measurements.
